# Supplementary material
Source: PubMed Central journal article supplement (PMC8460848)

**Supplementary Material S1** for full search records

COVID-19 is an emerging, rapidly evolving situation.

Get the latest public health information from CDC: <https://www.coronavirus.gov>.

Get the latest research from NIH: <https://www.nih.gov/coronavirus>.

Find NCBI SARS-CoV-2 literature, sequence, and clinical content: <https://www.ncbi.nlm.nih.gov/sars-cov-2/>.

**PubMed Advanced Search Builder**

Add terms to the query box

Title/Abstract

Enter a search term

ADD

Show Index

Query box

Enter / edit your search query here

Search

**History and Search Details**

| Search | Actions | Details | Query                                                                                                                                                                                                                                                                                                                                                                                                                                                                                                                                                                                                                                                                                                                                                                 | Results | Time     |
|--------|---------|---------|-----------------------------------------------------------------------------------------------------------------------------------------------------------------------------------------------------------------------------------------------------------------------------------------------------------------------------------------------------------------------------------------------------------------------------------------------------------------------------------------------------------------------------------------------------------------------------------------------------------------------------------------------------------------------------------------------------------------------------------------------------------------------|---------|----------|
| #12    | ...     |         | Search: (((((((((compassion[Title/Abstract]) AND (PTSD[Title/Abstract])) OR ((self-compassion[Title/Abstract] AND (PTSD[Title/Abstract]))) OR ((self-compassionate[Title/Abstract] AND (PTSD[Title/Abstract]))) OR ((self-warmth[Title/Abstract] AND (PTSD[Title/Abstract]))) OR ((self-kindness[Title/Abstract] AND (PTSD[Title/Abstract]))) OR ((compassion[Title/Abstract] AND (post traumatic stress[Title/Abstract]))) OR ((self-compassion[Title/Abstract] AND (post traumatic stress[Title/Abstract]))) OR ((self-compassionate[Title/Abstract] AND (post traumatic stress[Title/Abstract]))) OR ((self-warmth[Title/Abstract] AND (post traumatic stress[Title/Abstract]))) OR ((self-kindness[Title/Abstract] AND (post traumatic stress[Title/Abstract])))) | 123     | 21:49:27 |
| #11    | ...     |         | Search: (self-kindness[Title/Abstract]) AND (post traumatic stress[Title/Abstract])                                                                                                                                                                                                                                                                                                                                                                                                                                                                                                                                                                                                                                                                                   | 0       | 21:47:55 |
| #10    | ...     |         | Search: (self-warmth[Title/Abstract]) AND (post traumatic stress[Title/Abstract])                                                                                                                                                                                                                                                                                                                                                                                                                                                                                                                                                                                                                                                                                     | 0       | 21:47:35 |
| #9     | ...     |         | Search: (self-compassionate[Title/Abstract]) AND (post traumatic stress[Title/Abstract])                                                                                                                                                                                                                                                                                                                                                                                                                                                                                                                                                                                                                                                                              | 0       | 21:47:06 |
| #8     | ...     |         | Search: (self-compassion[Title/Abstract]) AND (post traumatic stress[Title/Abstract])                                                                                                                                                                                                                                                                                                                                                                                                                                                                                                                                                                                                                                                                                 | 12      | 21:46:47 |
| #7     | ...     |         | Search: (compassion[Title/Abstract]) AND (post traumatic stress[Title/Abstract])                                                                                                                                                                                                                                                                                                                                                                                                                                                                                                                                                                                                                                                                                      | 63      | 21:46:20 |
| #6     | ...     |         | Search: (self-kindness[Title/Abstract]) AND (PTSD[Title/Abstract])                                                                                                                                                                                                                                                                                                                                                                                                                                                                                                                                                                                                                                                                                                    | 3       | 21:45:37 |

| Search | Actions | Details | Query                                                                          | Results | Time     |
|--------|---------|---------|--------------------------------------------------------------------------------|---------|----------|
| #5     | ...     |         | Search: <b>(self-warmth[Title/Abstract]) AND (PTSD[Title/Abstract])</b>        | 0       | 21:45:00 |
| #4     | ...     |         | Search: <b>(self-compassionate[Title/Abstract]) AND (PTSD[Title/Abstract])</b> | 0       | 21:44:48 |
| #2     | ...     |         | Search: <b>(self-compassion[Title/Abstract]) AND (PTSD[Title/Abstract])</b>    | 32      | 21:32:26 |
| #1     | ...     |         | Search: <b>(compassion[Title/Abstract]) AND (PTSD[Title/Abstract])</b>         | 88      | 21:32:01 |

Showing 1 to 11 of 11 entries

[Basic Search](#) | [Find Citation](#) | [Search Tools](#) | [Search Fields](#) | **Advanced Search** | [Multi-Field Search](#)

1 Resource selected | [Hide](#) | [Change](#)

**Embase Classic+Embase** 1947 to 2020 September 04

Enter keyword or phrase  
(\* or \$ for truncation)

**Keyword**  Author  Title  Journal



▼ **Limits** *(close)*  Include Multimedia  Map Term to Subject Heading

- Full Text
- Human
- No Language Specified
- Latest Update
- Cochrane Library
- COVID-19
- Abstracts
- English Language

Publication Year  -

Embase Status

- 
- Article-in-Press Status
- Conference Abstract Status
- Embase Status
- In-Process Status

NLM Status

- 
- In-Data-Review
- In-Process
- PubMed-not-MEDLINE
- PubMed/MEDLINE
- Publisher

▼ **Search History** (21)

[View Saved](#)

| <input type="checkbox"/> | # ▲ | Searches                                                                                                                                                                                                                 | Results | Type     | Actions                                                | Annotations                                       |
|--------------------------|-----|--------------------------------------------------------------------------------------------------------------------------------------------------------------------------------------------------------------------------|---------|----------|--------------------------------------------------------|---------------------------------------------------|
| <input type="checkbox"/> | 1   | (self-compassion and PTSD).mp. [mp=title, abstract, heading word, drug trade name, original title, device manufacturer, drug manufacturer, device trade name, keyword, floating subheading word, candidate term word]    | 32      | Advanced | <a href="#">Display Results</a>   <a href="#">More</a> | <input type="checkbox"/> <a href="#">Contract</a> |
| <input type="checkbox"/> | 2   | limit 1 to (abstracts and human and english language)                                                                                                                                                                    | 30      | Advanced | <a href="#">Display Results</a>   <a href="#">More</a> | <input type="checkbox"/>                          |
| <input type="checkbox"/> | 3   | (compassion and PTSD).mp. [mp=title, abstract, heading word, drug trade name, original title, device manufacturer, drug manufacturer, device trade name, keyword, floating subheading word, candidate term word]         | 125     | Advanced | <a href="#">Display Results</a>   <a href="#">More</a> | <input type="checkbox"/>                          |
| <input type="checkbox"/> | 4   | limit 3 to (abstracts and human and english language)                                                                                                                                                                    | 119     | Advanced | <a href="#">Display Results</a>   <a href="#">More</a> | <input type="checkbox"/>                          |
| <input type="checkbox"/> | 5   | (self-compassionate and PTSD).mp. [mp=title, abstract, heading word, drug trade name, original title, device manufacturer, drug manufacturer, device trade name, keyword, floating subheading word, candidate term word] | 0       | Advanced | <a href="#">Save</a>   <a href="#">More</a>            | <input type="checkbox"/>                          |
| <input type="checkbox"/> | 6   | limit 5 to (abstracts and human and english language)                                                                                                                                                                    | 0       | Advanced | <a href="#">Save</a>   <a href="#">More</a>            | <input type="checkbox"/>                          |
| <input type="checkbox"/> | 7   | (self-warmth and PTSD).mp. [mp=title, abstract, heading word, drug trade name, original title, device manufacturer, drug manufacturer, device trade name, keyword, floating subheading word, candidate term word]        | 0       | Advanced | <a href="#">Save</a>   <a href="#">More</a>            | <input type="checkbox"/>                          |
| <input type="checkbox"/> | 8   | limit 7 to (abstracts and human and english language)                                                                                                                                                                    | 0       | Advanced | <a href="#">Save</a>   <a href="#">More</a>            | <input type="checkbox"/>                          |
| <input type="checkbox"/> | 9   | (self-kindness and PTSD).mp. [mp=title, abstract, heading word, drug trade name, original title, device manufacturer, drug manufacturer, device                                                                          | 3       | Advanced | <a href="#">Display Results</a>   <a href="#">More</a> | <input type="checkbox"/>                          |

trade name, keyword, floating subheading word, candidate term word]

|                          |    |                                                                                                                                                                                                                                           |     |          |                                                        |  |
|--------------------------|----|-------------------------------------------------------------------------------------------------------------------------------------------------------------------------------------------------------------------------------------------|-----|----------|--------------------------------------------------------|--|
| <input type="checkbox"/> | 10 | limit 9 to (abstracts and human and english language)                                                                                                                                                                                     | 3   | Advanced | <a href="#">Display Results</a>   <a href="#">More</a> |  |
| <input type="checkbox"/> | 11 | (self-compassion and post traumatic stress).mp. [mp=title, abstract, heading word, drug trade name, original title, device manufacturer, drug manufacturer, device trade name, keyword, floating subheading word, candidate term word]    | 15  | Advanced | <a href="#">Display Results</a>   <a href="#">More</a> |  |
| <input type="checkbox"/> | 12 | limit 11 to (abstracts and human and english language)                                                                                                                                                                                    | 13  | Advanced | <a href="#">Display Results</a>   <a href="#">More</a> |  |
| <input type="checkbox"/> | 13 | (compassion and post traumatic stress).mp. [mp=title, abstract, heading word, drug trade name, original title, device manufacturer, drug manufacturer, device trade name, keyword, floating subheading word, candidate term word]         | 82  | Advanced | <a href="#">Display Results</a>   <a href="#">More</a> |  |
| <input type="checkbox"/> | 14 | limit 13 to (abstracts and human and english language)                                                                                                                                                                                    | 76  | Advanced | <a href="#">Display Results</a>   <a href="#">More</a> |  |
| <input type="checkbox"/> | 15 | (self-compassionate and post traumatic stress).mp. [mp=title, abstract, heading word, drug trade name, original title, device manufacturer, drug manufacturer, device trade name, keyword, floating subheading word, candidate term word] | 0   | Advanced | <a href="#">Save</a>   <a href="#">More</a>            |  |
| <input type="checkbox"/> | 16 | limit 15 to (abstracts and human and english language)                                                                                                                                                                                    | 0   | Advanced | <a href="#">Save</a>   <a href="#">More</a>            |  |
| <input type="checkbox"/> | 17 | (self-warmth and post traumatic stress).mp. [mp=title, abstract, heading word, drug trade name, original title, device manufacturer, drug manufacturer, device trade name, keyword, floating subheading word, candidate term word]        | 0   | Advanced | <a href="#">Save</a>   <a href="#">More</a>            |  |
| <input type="checkbox"/> | 18 | limit 17 to (abstracts and human and english language)                                                                                                                                                                                    | 0   | Advanced | <a href="#">Save</a>   <a href="#">More</a>            |  |
| <input type="checkbox"/> | 19 | (self-kindness and post traumatic stress).mp. [mp=title, abstract, heading word, drug trade name, original title, device manufacturer, drug manufacturer, device trade name, keyword, floating subheading word, candidate term word]      | 0   | Advanced | <a href="#">Save</a>   <a href="#">More</a>            |  |
| <input type="checkbox"/> | 20 | limit 19 to (abstracts and human and english language)                                                                                                                                                                                    | 0   | Advanced | <a href="#">Save</a>   <a href="#">More</a>            |  |
| <input type="checkbox"/> | 21 | 2 or 4 or 6 or 8 or 10 or 12 or 14 or 16 or 18 or 20                                                                                                                                                                                      | 154 | Advanced | <a href="#">Display Results</a>   <a href="#">More</a> |  |

[Save](#) [Remove](#) Combine with: [AND](#) [OR](#)

[Save All](#) [Edit](#) [Create RSS](#) [View Saved](#)

Options

To search Open Access content on Ovid, go to [Basic Search](#).

[Print](#) [Email](#) [Export](#) [+ My Projects](#) [Keep Selected](#)

**Search Information**

**You searched:**

(self-kindness and PTSD).mp. [mp=title, abstract, heading word, drug trade name, original title, device manufacturer, drug manufacturer, device trade name, keyword, floating subheading word, candidate term word]

**Search terms used:**

ptsd  
self-kindness

All  [Clear](#)

1. [Barriers to self-compassion for female survivors of childhood maltreatment: The roles of fear of self-compassion and psychological inflexibility.](#)

Boykin D.M., Himmerich S.J., Pinciotti C.M., Miller L.M., Miron L.R., Orcutt H.K.  
*Child Abuse and Neglect*. 76 (pp 216-224), 2018. Date of Publication: February 2018.

[Article]

**Publisher**  
Elsevier Ltd

[Abstract Reference](#)  
[Complete Reference](#)

[Find Similar](#)  
 [Find Citing Articles](#)

[Check for full text](#)

Search Returned:

3 text results

Sort By:

-

Customize Display

Filter By

Add to Search History

Selected Only ( 0 )

Years

All Years

Current year

Past 3 years

Past 5 years

Specific Year Range

Subject

Author

Journal

Publication Type

My Projects

+ New Project

No projects available.

JBI EBP Tools

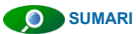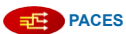

Abstract Cite + My Projects + Annotate

- 2. **Self-Compassion as a prospective predictor of PTSD symptom severity among trauma-exposed U.S. Iraq and Afghanistan war veterans.**

Hiraoka R., Meyer E.C., Kimbrel N.A., DeBeer B.B., Gulliver S.B., Morissette S.B.

Journal of traumatic stress. 28 (2) (pp 127-133), 2015. Date of Publication: 01 Apr 2015.

[Article]

Abstract Cite + My Projects + Annotate

Abstract Reference Complete Reference

Find Similar Find Citing Articles

Check for full text

- 3. **Self-compassion is associated with emotional stress and perceived health-related functioning in veterans.**

Dinh J., Walsler R., Best S., Cloitre M., McCaslin-Rodrigo S.

Psychosomatic Medicine. Conference: 72nd Annual Scientific Meeting of the American Psychosomatic Society. San Francisco, CA United States. Conference Publication: (var.pagings). 76 (3) (pp A-115), 2014. Date of Publication: April 2014.

[Conference Abstract]

Publisher

Lippincott Williams and Wilkins

Abstract Cite + My Projects + Annotate

Abstract Reference Complete Reference

Find Similar Find Citing Articles

Check for full text

All Range Clear 20 Per Page

Print Email Export + My Projects Keep Selected

English Français Italiano Deutsch 日本語 繁體中文 Español 简体中文 한국어

About Us Contact Us Privacy Policy Terms of Use

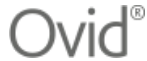

[My Account](#)

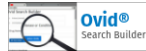

[Monash University Library](#)

[Help](#)

[Feedback](#)

[Logoff](#)

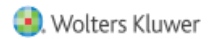

[Ask a Monash University Librarian](#)

[Search](#) [Journals](#) [Books](#) [Multimedia](#) [My Workspace](#) [EBP Tools](#) [What's New](#)

[Basic Search](#) | [Find Citation](#) | [Search Tools](#) | [Search Fields](#) | **[Advanced Search](#)** | [Multi-Field Search](#)

1 Resource selected | [Hide](#) | [Change](#)

**APA PsycInfo** 1806 to August Week 5 2020

Enter keyword or phrase (\* or \$ for truncation)  **Keyword**  Author  Title  Journal

**Limits** (close)  Include Multimedia  Map Term to Subject Heading

- APA PsycArticles Journals
- All Journals
- Latest Update
- Human
- English Language
- Abstracts
- Test DOI
- Open Access
- Impact Statement

Publication Year -  -

**Search History** (21)

[View Saved](#)

| <input type="checkbox"/> | # ▲ | Searches                                                                                                                                                    | Results | Type     | Actions                                                | Annotations                                       |
|--------------------------|-----|-------------------------------------------------------------------------------------------------------------------------------------------------------------|---------|----------|--------------------------------------------------------|---------------------------------------------------|
| <input type="checkbox"/> | 1   | (compassion and PTSD).mp. [mp=title, abstract, heading word, table of contents, key concepts, original title, tests & measures, mesh]                       | 220     | Advanced | <a href="#">Display Results</a>   <a href="#">More</a> | <input type="checkbox"/> <a href="#">Contract</a> |
| <input type="checkbox"/> | 2   | limit 1 to (all journals and human and english language and abstracts)                                                                                      | 119     | Advanced | <a href="#">Display Results</a>   <a href="#">More</a> | <input type="checkbox"/>                          |
| <input type="checkbox"/> | 3   | (self-compassion and PTSD).mp. [mp=title, abstract, heading word, table of contents, key concepts, original title, tests & measures, mesh]                  | 75      | Advanced | <a href="#">Display Results</a>   <a href="#">More</a> | <input type="checkbox"/>                          |
| <input type="checkbox"/> | 4   | limit 3 to (all journals and human and english language and abstracts)                                                                                      | 49      | Advanced | <a href="#">Display Results</a>   <a href="#">More</a> | <input type="checkbox"/>                          |
| <input type="checkbox"/> | 5   | (self-compassionate and PTSD).mp. [mp=title, abstract, heading word, table of contents, key concepts, original title, tests & measures, mesh]               | 3       | Advanced | <a href="#">Display Results</a>   <a href="#">More</a> | <input type="checkbox"/>                          |
| <input type="checkbox"/> | 6   | limit 5 to (all journals and human and english language and abstracts)                                                                                      | 1       | Advanced | <a href="#">Display Results</a>   <a href="#">More</a> | <input type="checkbox"/>                          |
| <input type="checkbox"/> | 7   | (self-warmth and PTSD).mp. [mp=title, abstract, heading word, table of contents, key concepts, original title, tests & measures, mesh]                      | 0       | Advanced | <a href="#">Save</a>   <a href="#">More</a>            | <input type="checkbox"/>                          |
| <input type="checkbox"/> | 8   | limit 7 to (all journals and human and english language and abstracts)                                                                                      | 0       | Advanced | <a href="#">Save</a>   <a href="#">More</a>            | <input type="checkbox"/>                          |
| <input type="checkbox"/> | 9   | (self-kindness and PTSD).mp. [mp=title, abstract, heading word, table of contents, key concepts, original title, tests & measures, mesh]                    | 8       | Advanced | <a href="#">Display Results</a>   <a href="#">More</a> | <input type="checkbox"/>                          |
| <input type="checkbox"/> | 10  | limit 9 to (all journals and human and english language and abstracts)                                                                                      | 6       | Advanced | <a href="#">Display Results</a>   <a href="#">More</a> | <input type="checkbox"/>                          |
| <input type="checkbox"/> | 11  | (compassion and post traumatic stress).mp. [mp=title, abstract, heading word, table of contents, key concepts, original title, tests & measures, mesh]      | 137     | Advanced | <a href="#">Display Results</a>   <a href="#">More</a> | <input type="checkbox"/>                          |
| <input type="checkbox"/> | 12  | limit 11 to (all journals and human and english language and abstracts)                                                                                     | 74      | Advanced | <a href="#">Display Results</a>   <a href="#">More</a> | <input type="checkbox"/>                          |
| <input type="checkbox"/> | 13  | (self-compassion and post traumatic stress).mp. [mp=title, abstract, heading word, table of contents, key concepts, original title, tests & measures, mesh] | 26      | Advanced | <a href="#">Display Results</a>   <a href="#">More</a> | <input type="checkbox"/>                          |
| <input type="checkbox"/> | 14  | limit 13 to (all journals and human and english language and abstracts)                                                                                     | 17      | Advanced | <a href="#">Display Results</a>   <a href="#">More</a> | <input type="checkbox"/>                          |

|                          |    |                                                                                                                                                                |     |          |                                                        |  |
|--------------------------|----|----------------------------------------------------------------------------------------------------------------------------------------------------------------|-----|----------|--------------------------------------------------------|--|
| <input type="checkbox"/> | 15 | (self-compassionate and post traumatic stress).mp. [mp=title, abstract, heading word, table of contents, key concepts, original title, tests & measures, mesh] | 1   | Advanced | <a href="#">Display Results</a>   <a href="#">More</a> |  |
| <input type="checkbox"/> | 16 | limit 15 to (all journals and human and english language and abstracts)                                                                                        | 0   | Advanced | <a href="#">Save</a>   <a href="#">More</a>            |  |
| <input type="checkbox"/> | 17 | (self-warmth and post traumatic stress).mp. [mp=title, abstract, heading word, table of contents, key concepts, original title, tests & measures, mesh]        | 0   | Advanced | <a href="#">Save</a>   <a href="#">More</a>            |  |
| <input type="checkbox"/> | 18 | limit 17 to (all journals and human and english language and abstracts)                                                                                        | 0   | Advanced | <a href="#">Save</a>   <a href="#">More</a>            |  |
| <input type="checkbox"/> | 19 | (self-kindness and post traumatic stress).mp. [mp=title, abstract, heading word, table of contents, key concepts, original title, tests & measures, mesh]      | 3   | Advanced | <a href="#">Display Results</a>   <a href="#">More</a> |  |
| <input type="checkbox"/> | 20 | limit 19 to (all journals and human and english language and abstracts)                                                                                        | 2   | Advanced | <a href="#">Display Results</a>   <a href="#">More</a> |  |
| <input type="checkbox"/> | 21 | 2 or 4 or 6 or 8 or 10 or 12 or 14 or 16 or 18 or 20                                                                                                           | 164 | Advanced | <a href="#">Display Results</a>   <a href="#">More</a> |  |

Combine with:

[View Saved](#)

Options

To search Open Access content on Ovid, go to [Basic Search](#).

[Print](#)
[Email](#)
[Export](#)
[+ My Projects](#)
[Keep Selected](#)

### Search Information

#### You searched:

(self-compassionate and post traumatic stress).mp. [mp=title, abstract, heading word, table of contents, key concepts, original title, tests & measures, mesh]

#### Search terms used:

post  
 traumatic  
 stress  
 self-compassionate

#### Search Returned:

1 text results

#### Sort By:

-

[Customize Display](#)

### Filter By

[Add to Search History](#)

[Selected Only](#) ( 0 )

#### Years

All Years

[Current year](#)

[Past 3 years](#)

[Past 5 years](#)

#### Specific Year Range

[Author](#)

[Journal](#)

[Publication Type](#)

All

1. **Self-compassion and cognitive flexibility in trauma-exposed individuals with and without ptsd. [References].**

Daneshvar, Somayeh; Basharpour, Sajjad; Shafiei, Masumeh.

*Current Psychology: A Journal for Diverse Perspectives on Diverse Psychological Issues.* 2020, pp. No Pagination Specified.

[Journal; Peer Reviewed Journal]

#### Year of Publication

2020

#### Publication Month/Season

Apr

[Abstract](#)

[Abstract Reference](#)  
[Complete Reference](#)

[Check for full text](#)

All

[Print](#)
[Email](#)
[Export](#)
[+ My Projects](#)
[Keep Selected](#)

### My Projects

 + New Project

No projects available.

### JBI EBP Tools

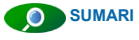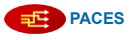

English

Français

Italiano

Deutsch

日本語

繁體中文

Español

简体中文

한국어

[About Us](#)

[Contact Us](#)

[Privacy Policy](#)

[Terms of Use](#)

© 2020 [Ovid Technologies, Inc.](#) All rights reserved. OvidUI\_04.09.00.003, SourceID f34009fb540e822fc8d4e2c281e211c1d095b03e



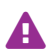

**Cookies**

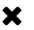

Our site uses cookies to improve your experience. You can find out more about our use of cookies in About Cookies, including instructions on how to turn off cookies if you wish to do so. By continuing to browse this site you agree to us using cookies as described in [About Cookies](#).

I accept

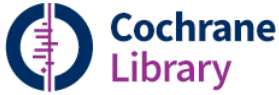

Access provided by: **Monash University Library**

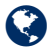

**We noticed your browser language is Simplified Chinese.**

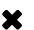

You can select your preferred language at the top of any page, and you will see translated Cochrane Review sections in this language. Change to **Simplified Chinese**.

# Advanced Search

Search manager

Save this search

View saved searches

Search help

View fewer lines

Print

|   |   |     |                                                                 |   |        |    |
|---|---|-----|-----------------------------------------------------------------|---|--------|----|
| + |   |     |                                                                 |   |        |    |
| - | + | #1  | (self-compassion):ti,ab,kw AND (PTSD):ti,ab,kw                  | S | Limits | 18 |
| - | + | #2  | (self-compassionate):ti,ab,kw AND (PTSD):ti,ab,kw               | S | Limits | 1  |
| - | + | #3  | (compassion):ti,ab,kw AND (PTSD):ti,ab,kw                       | S | Limits | 29 |
| - | + | #4  | (self-warmth):ti,ab,kw AND (PTSD):ti,ab,kw                      | S | Limits | 0  |
| - | + | #5  | (self-kindness):ti,ab,kw AND (PTSD):ti,ab,kw                    | S | Limits | 0  |
| - | + | #6  | (self-compassion):ti,ab,kw AND (post traumatic stress):ti,ab,kw | S | Limits | 13 |
| - | + | #7  | (self-compassionate):ti,ab,kw AND (post traumatic               | S | Limits | 1  |
| - | + | #8  | (compassion):ti,ab,kw AND (post traumatic stress):ti,ab,kw      | S | Limits | 29 |
| - | + | #9  | (self-warmth):ti,ab,kw AND (post traumatic stress):ti,ab,kw     | S | Limits | 0  |
| - | + | #10 | (self-kindness):ti,ab,kw AND (post traumatic stress):ti,ab,kw   | S | Limits | 1  |
| - | + | #11 | #1OR#2OR#3OR#4OR#5OR#6OR#7OR#8OR#9OR#10                         |   | Limits | 40 |

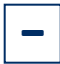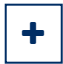

#12

Type a search term or use the S or MeSH

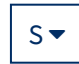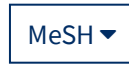

Limits

N/A

✕ Clear all

Highlight orphan lines

Save this search ▼

View saved searches

? Search help

View fewer lines

Print

### ***Supplementary material Table 1***

#### *Inclusion and exclusion criteria*

|                         | Inclusion                                                | Exclusion                                                                             |
|-------------------------|----------------------------------------------------------|---------------------------------------------------------------------------------------|
| <b>Interventions</b>    | An intervention with primary focus on self-compassion    | Interventions without explicit focus on self-compassion.                              |
| <b>Comparisons</b>      | Before and after intervention                            | No baseline measurement                                                               |
| <b>Study design</b>     | Pre-post studies<br>Crossover or parallel design         | -                                                                                     |
| <b>Outcomes</b>         | A standardised measure to evaluate PTSD symptoms         | No PTSD or post-traumatic stress measure                                              |
| <b>Data reported</b>    | Data that enables analysis and estimation of effect size | Unpublished data<br>Data without Mean<br>Data without SD/SEM<br>Data without <i>N</i> |
| <b>Publication type</b> | Peer-reviewed journal<br>Written in English              | Review article<br>Case report<br>Grey literature<br>Non-English article               |

*Note.* SD = standard deviation; SEM = standard error of mean; *N* = sample size; PTSD = posttraumatic stress disorder.

**Supplementary Material S2** the methods used to measure heterogeneity and publication bias in detail

## **Method**

### **Test of Heterogeneity**

In systematic review and meta-analyses, conclusions are less clear when the results vary across studies (Higgins et al., 2003). In this meta-analysis, heterogeneity between studies was evaluated using  $I^2$  statistic, which indicates the percentage of total variance that is due to between-study variation. It is expressed as  $I^2 = 100\% \times (Q - df)/Q$ , in which df means degree of freedom, and Q is calculated by summing the squared deviations of each study's estimate from the overall meta-analytic estimate (Higgins et al., 2003). Values of 25%, 50%, and 75% were described as low, moderate, and large heterogeneity respectively.

Additionally, Galbraith plot was used to evaluate and depict the between-study variation. Galbraith plot illustrates the percentage of studies which lie within two standard errors of the effect estimate (i.e. meta-analytic estimate divided by its standard error). The effect is consistent across studies when more than 95% of included studies positioning within two standard errors of the population effect (Thompson, 1994). We expected to see heterogeneity across studies due to the variations in studies (e.g. samples, PTSD outcomes, interventions, and duration). Random-effect models were therefore used which allows for statistical control of heterogeneity and generalization of meta-analytic results.

### **Publication Bias**

Publication bias may also affect the reliability of result estimates. Different methodologies were used to examine publication bias in this review (Che et al., 2018). Overall, the selectivity funnel plot depicts effect estimates against sample size, which is a

straightforward way to visually inspect publication bias. Moreover, the objective statistics, i.e. Begg and Mazumdar's rank correlations and Egger's regression intercept test were further carried out. The Begg and Mazumdar test is a rank correlation test which associates the standardized effect estimates with the variance of the effect estimates (Begg & Mazumdar, 1994). Egger's regression test is expressed as Standardized Effect Size =  $a + b * \text{Inverse Standard Error}$ , where intercept 'a' is a measure of publication bias (Egger et al., 1997). Additionally, a Bayesian approach was used to create the posterior distribution of a mitigated test statistic which provides inferences to the existence of an effect (Guan & Vandekerckhove, 2016).

#### **Reference:**

- Begg, C. B., & Mazumdar, M. (1994). Operating characteristics of a rank correlation test for publication bias. *Biometrics*, 1088-1101.
- Che, X., Cash, R., Chung, S., Fitzgerald, P. B., & Fitzgibbon, B. M. (2018). Investigating the influence of social support on experimental pain and related physiological arousal: A systematic review and meta-analysis. *Neuroscience & Biobehavioral Reviews*, 92, 437-452.
- Egger, M., Smith, G. D., Schneider, M., & Minder, C. (1997). Bias in meta-analysis detected by a simple, graphical test. *Bmj*, 315(7109), 629-634.
- Guan, M., & Vandekerckhove, J. (2016). A Bayesian approach to mitigation of publication bias. *Psychonomic bulletin & review*, 23(1), 74-86.
- Higgins, J. P., Thompson, S. G., Deeks, J. J., & Altman, D. G. (2003). Measuring inconsistency in meta-analyses. *Bmj*, 327(7414), 557-560.
- Thompson, S. G. (1994). Systematic Review: Why sources of heterogeneity in meta-analysis should be investigated. *Bmj*, 309(6965), 1351-1355.

*Supplementary Material Fig. 1* Risk of bias assessments. Each assessment component was presented as percentages across included studies

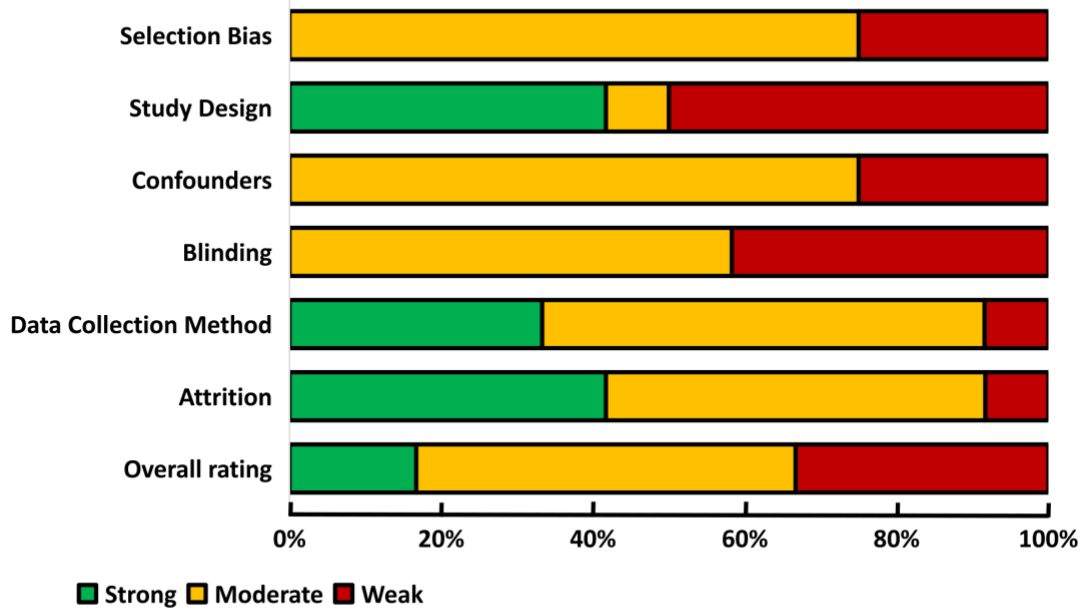

**Supplementary Material Fig. 2** Forest plot showing the effect of self-compassion focused interventions on PTSD in studies with a control group. Overall, a therapist is critical for self-compassion focused interventions to reduce PTSD symptoms (see upper versus lower parts of the figure). Held et al. (2015) conducted an intervention in the absence of a therapist.

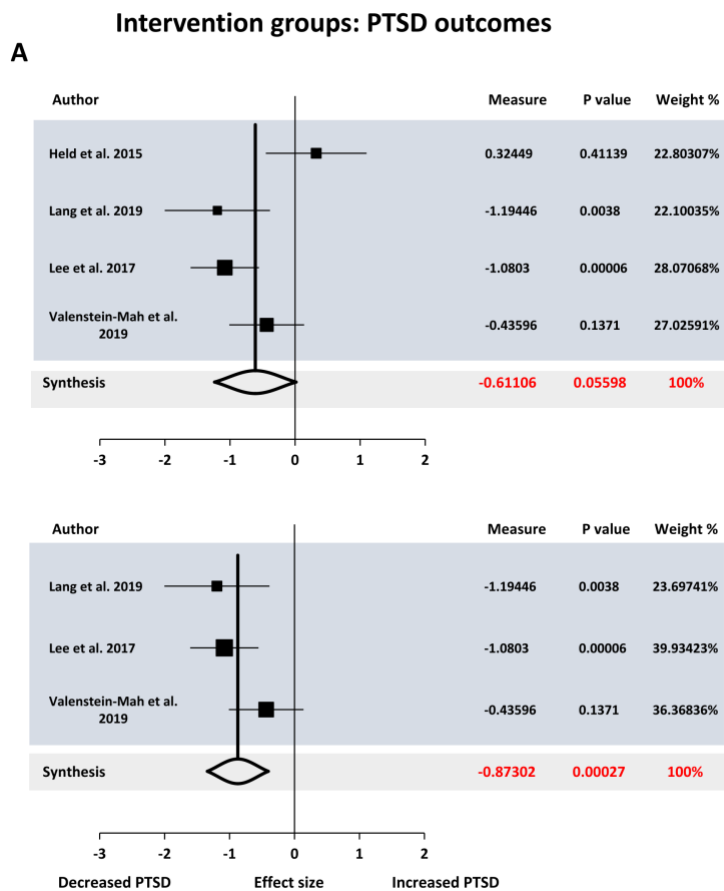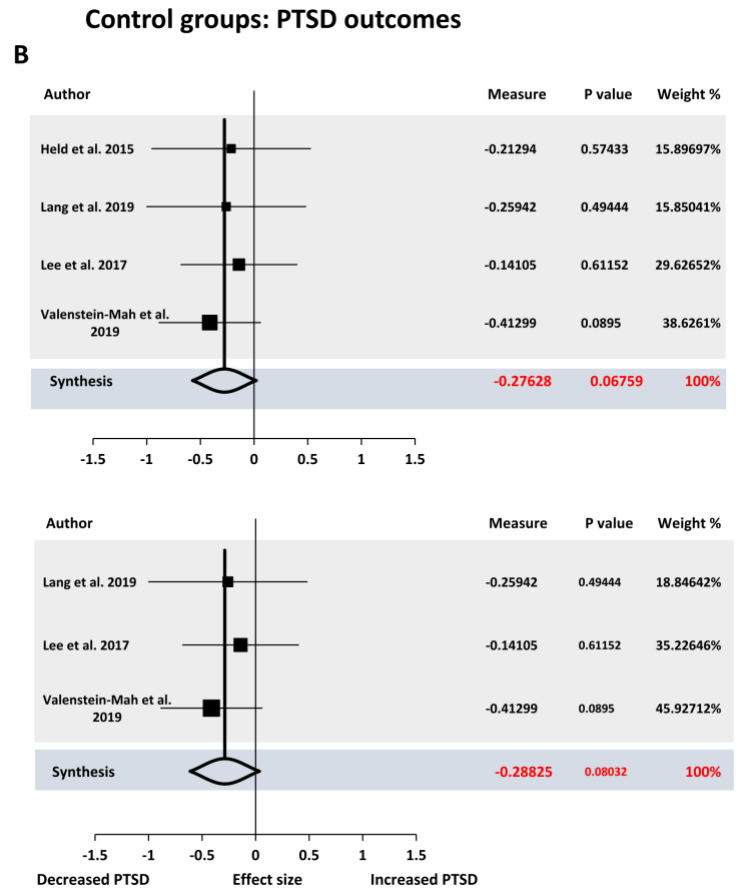

**Supplementary Material Fig. 3** Forrest plot of Hedge's adjust g analysis for effects of self-compassion focused interventions on reported PTSD after removing studies with weak quality.

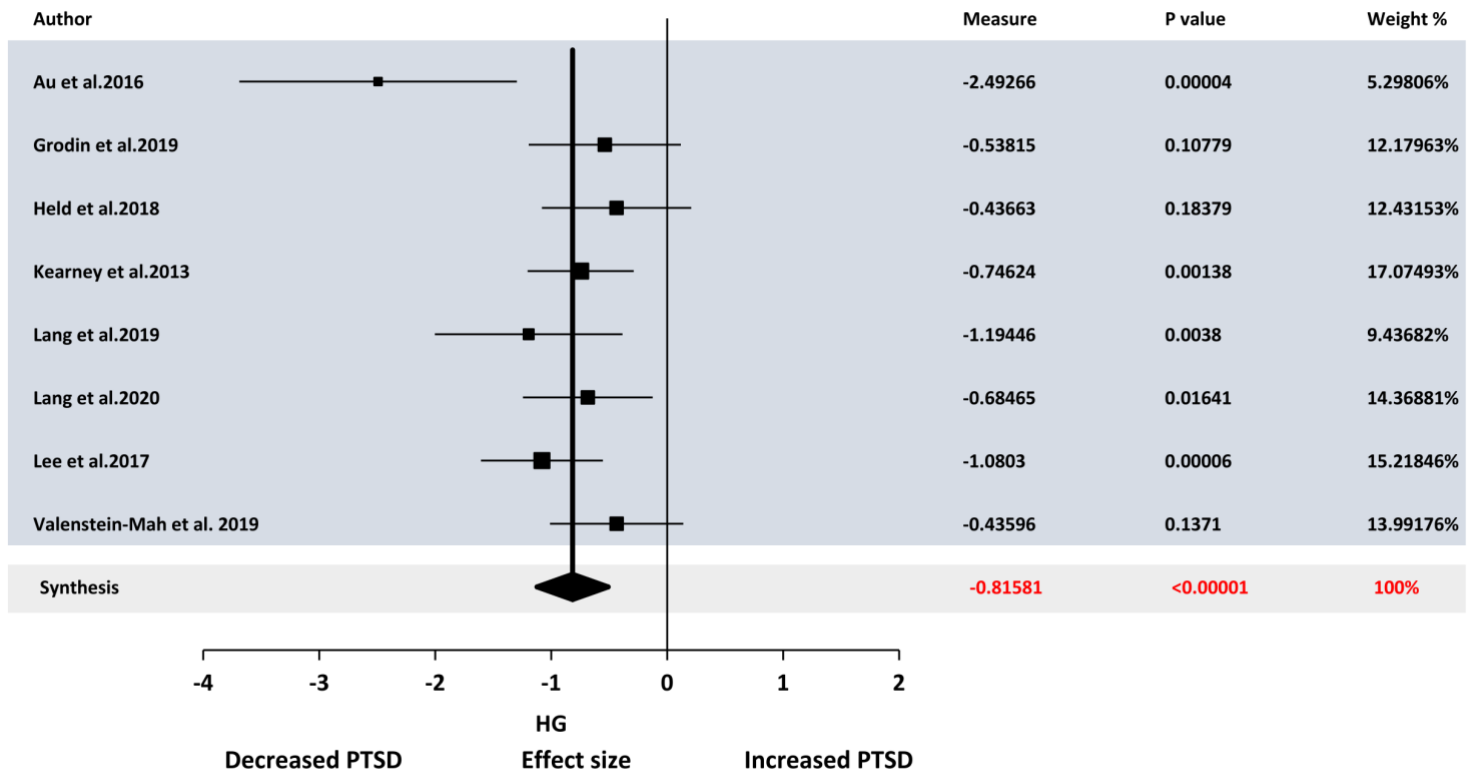



**Supplementary Material Fig. 4** Meta-regression analyses revealed the modulating impact of session number on intervention efficacy (a). But either baseline (b) or change scores (c) in reported self-compassion had no impact on intervention effects.

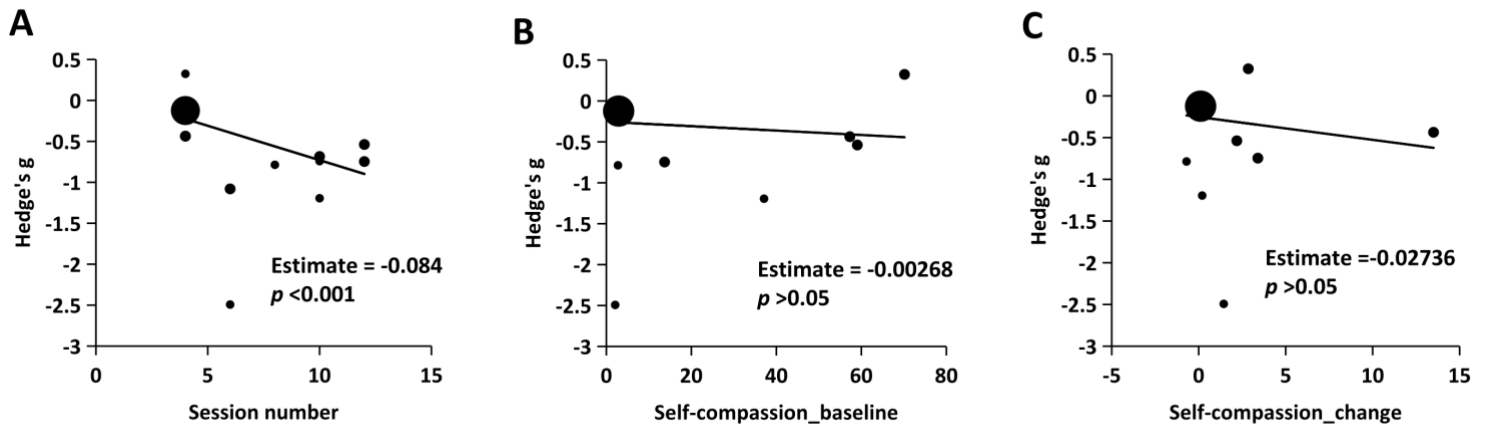

**Supplementary Material Fig. 5** Forrest plot of Hedge's adjust g analysis for effects of self-compassion focused interventions on reported self-compassion.

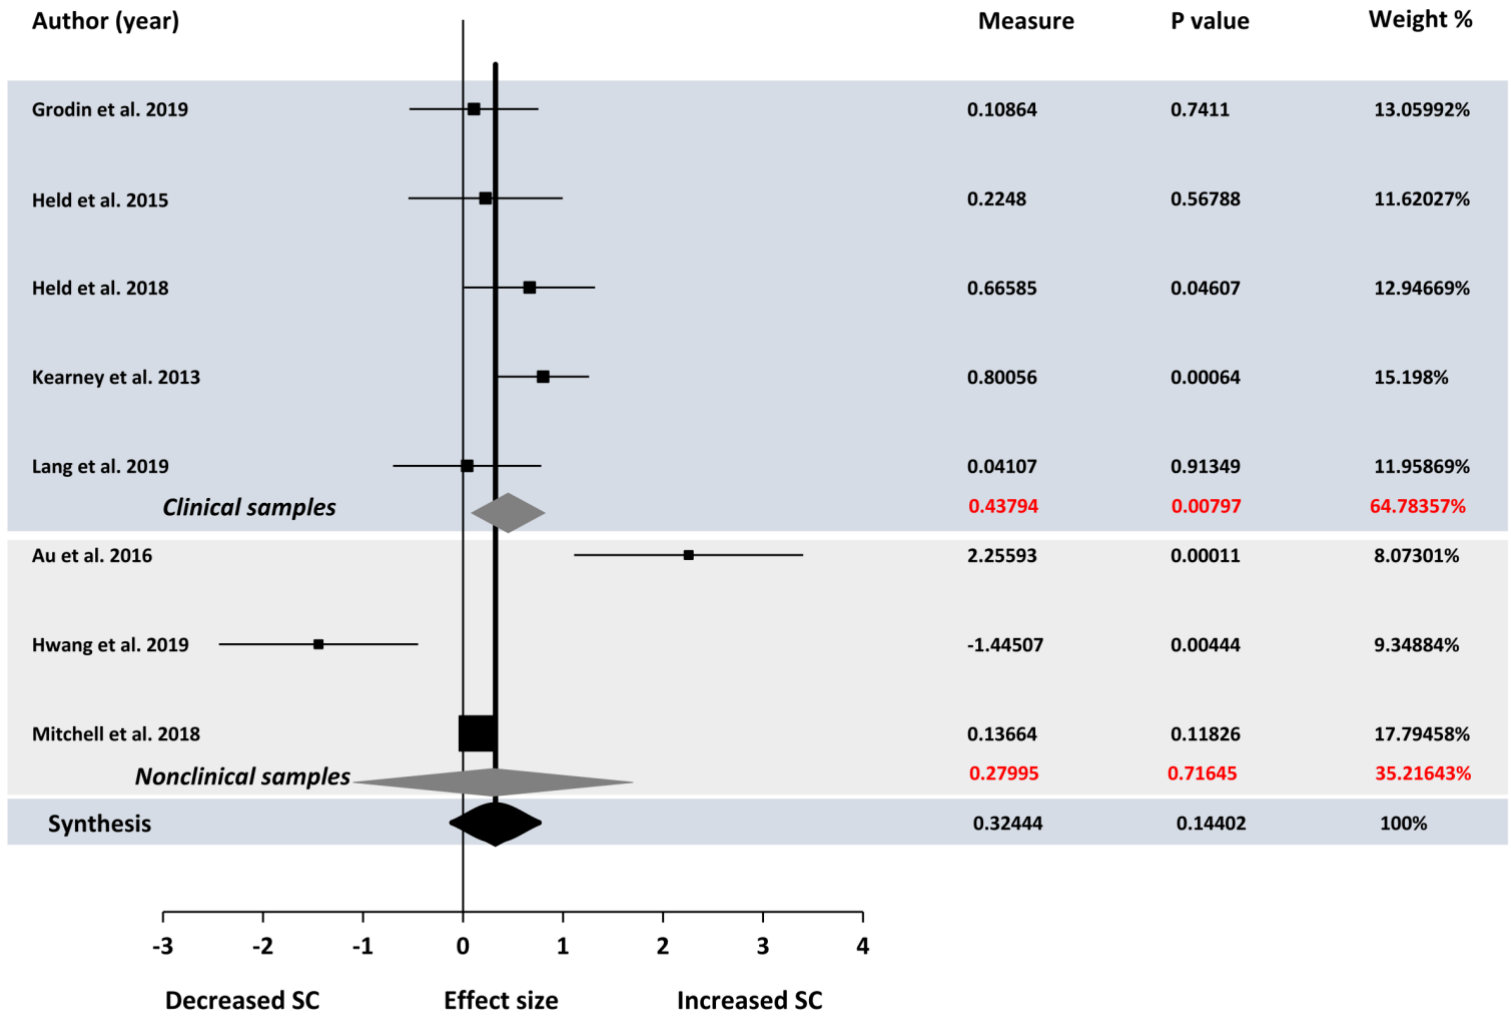

Supplement: 12671_2021_1732_MOESM1_ESM.pdf [file 12671_2021_1732_MOESM1_ESM.pdf]
